# Supplementary material
Source: publisher site journal article supplement (https://www.spandidos-publications.com/8273/downloadSupplementary)
Supplement: Supplementary file 1 [file downloadSupplementary]

**Table SI.** siRNA and shRNA sequences.

| <b>siRNA/shRNA</b>                         | <b>Target sequence</b>                                                                           |
|--------------------------------------------|--------------------------------------------------------------------------------------------------|
| siATP2B4                                   | UCAAAGCGUCCAUAGUUC<br>GAACUGACCUGUAUCGCGG<br>CCUCUGAUCUCACGCACUA<br>UGACAAGGCUUCUAAGUUU          |
| siNC                                       | UGGUUUACAUGUCGACUAA<br>UGGUUUACAUGUUGUGUGA<br>UGGUUUACAUGUUUCUGA<br>UGGUUUACAUGUUUCCUA           |
| shAtp2b4 C<br>shAtp2b4 D<br>Scramble shRNA | ACGAGTGTGCTCCTGTTGGATGGTGAAGC<br>TCG TTCAGAAGTAAGGACCGAGATAATAT<br>GCACTACCAGAGCTAACTCAGATAGTACT |
| shFOXM1                                    | GCCAATCGTTCTCTGACAGAA                                                                            |
| shFoxm1                                    | CGCTACTTGACATTGGACCAA                                                                            |

siRNA,small Interfering RNA; shRNA,short hairpin RNA

**Table SII.** TaqManProbes for qRT-PCR.

| <b>Human TaqMan Probes</b> |                        |
|----------------------------|------------------------|
| <b>Gene Symbol</b>         | <b>TaqMan Assay ID</b> |
| ATP2B4                     | Hs00608066_m1          |
| FOXMI                      | Hs01073586_m1          |
| ACTB                       | Hs01060665_g1          |

  

| <b>Mouse Taqman Probes for qRT-PCR</b> |                        |
|----------------------------------------|------------------------|
| <b>Gene Symbol</b>                     | <b>TaqMan Assay ID</b> |
| Atp2b4                                 | Mm01285597_m1          |
| Foxm1                                  | Mm00514924_m1          |
| Actb                                   | Mm02619580_g1          |
